# Supplementary material for: Characterization of [1]Benzothieno[3,2-b]benzothiophene (BTBT) Derivatives with End-Capping Groups as Solution-Processable Organic Semiconductors for Organic Field-Effect Transistors
Source: MDPI journal article supplement (doi:10.3390/coatings13010181), 2023-01-13
Supplement: s1 [file s1]

# Supporting Information for Characterization of [1]Ben- zothieno[3,2-*b*]benzothiophene (BTBT)-Derivatives with End- Capping Group as Solution-Processable Organic Semiconduc- tors for Organic Field-Effect Transistors

Seunghyup Ryu,<sup>†,1</sup> Chaeyoung Yun,<sup>†,2</sup> Soomin, Ryu,<sup>2</sup> Jihae Ahn,<sup>2</sup> Choongik Kim,<sup>1,\*</sup> and SungYong Seo<sup>2,3,\*</sup>

<sup>1</sup> Department of Chemical and Biomolecular Engineering, Sogang University, 1 Shinsoo-dong, Mapo-gu, Seoul 04107, Republic of Korea

<sup>2</sup> Department of Smart Green Technology Engineering, Pukyong National University, Busan, 48513, Korea

<sup>3</sup> Department of Chemistry, Pukyong National University, Busan, 48513, Korea

\* Correspondence: choongik@sogang.ac.kr; syseo@pknu.ac.kr

† These authors contributed equally to this work.

**Keywords:** Organic field-effect transistor; organic semiconductors; solution-process; [1]ben-  
zothieno[3,2-*b*]benzothiophene

**Citation:** To be added by editorial staff during production.

Academic Editor: Firstname Last-name

Received: date

Revised: date

Accepted: date

Published: date

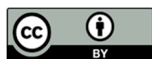

**Copyright:** © 2022 by the authors.

Submitted for possible open access

publication under the terms and

conditions of the Creative Commons

Attribution (CC BY) license

(<https://creativecommons.org/licenses/by/4.0/>).

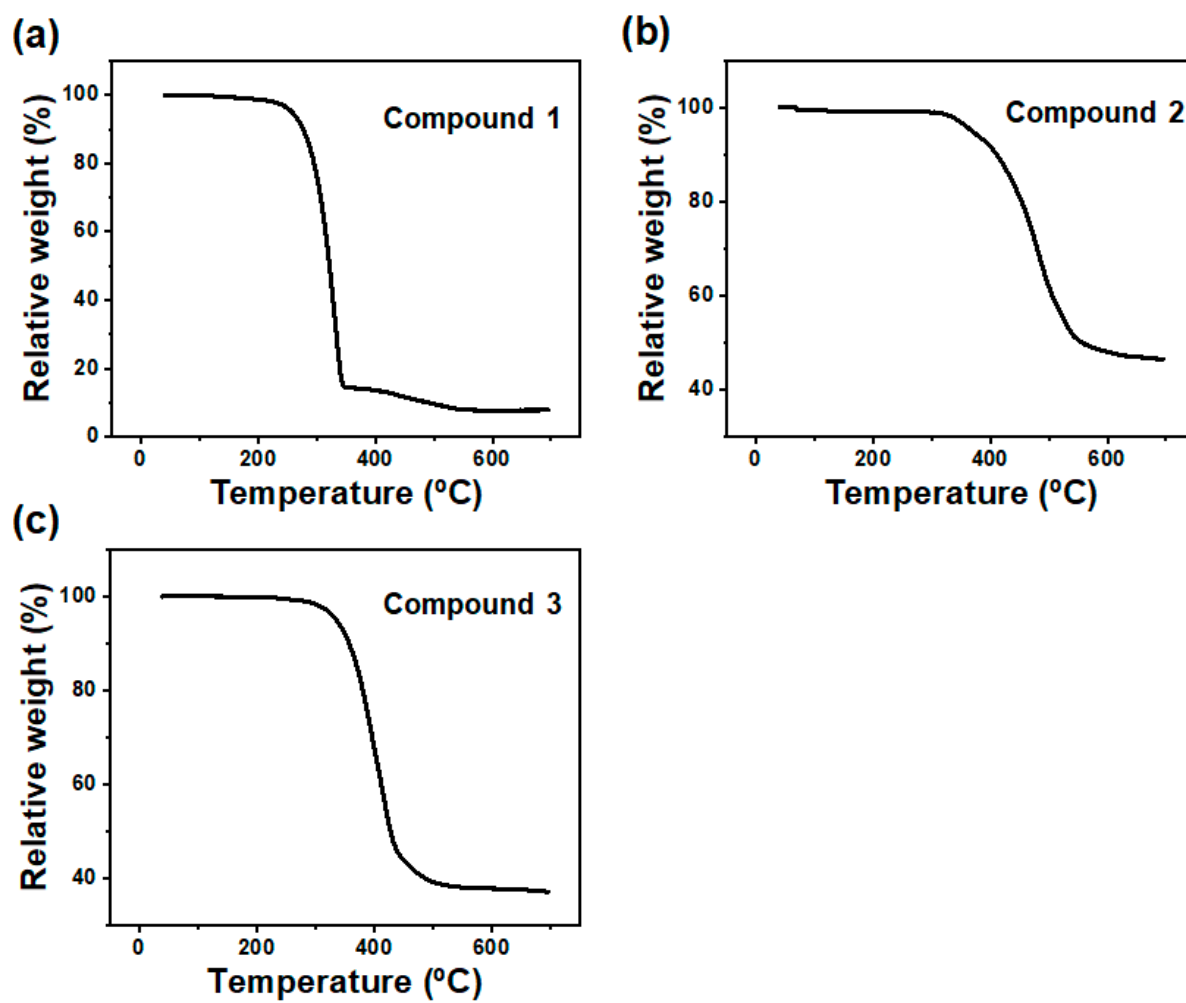

Figure S1. Thermogravimetric analysis (TGA) of BTBT-derivatives, (a) compound 1, (b) compound 2, and (c) compound 3.

15

16

17

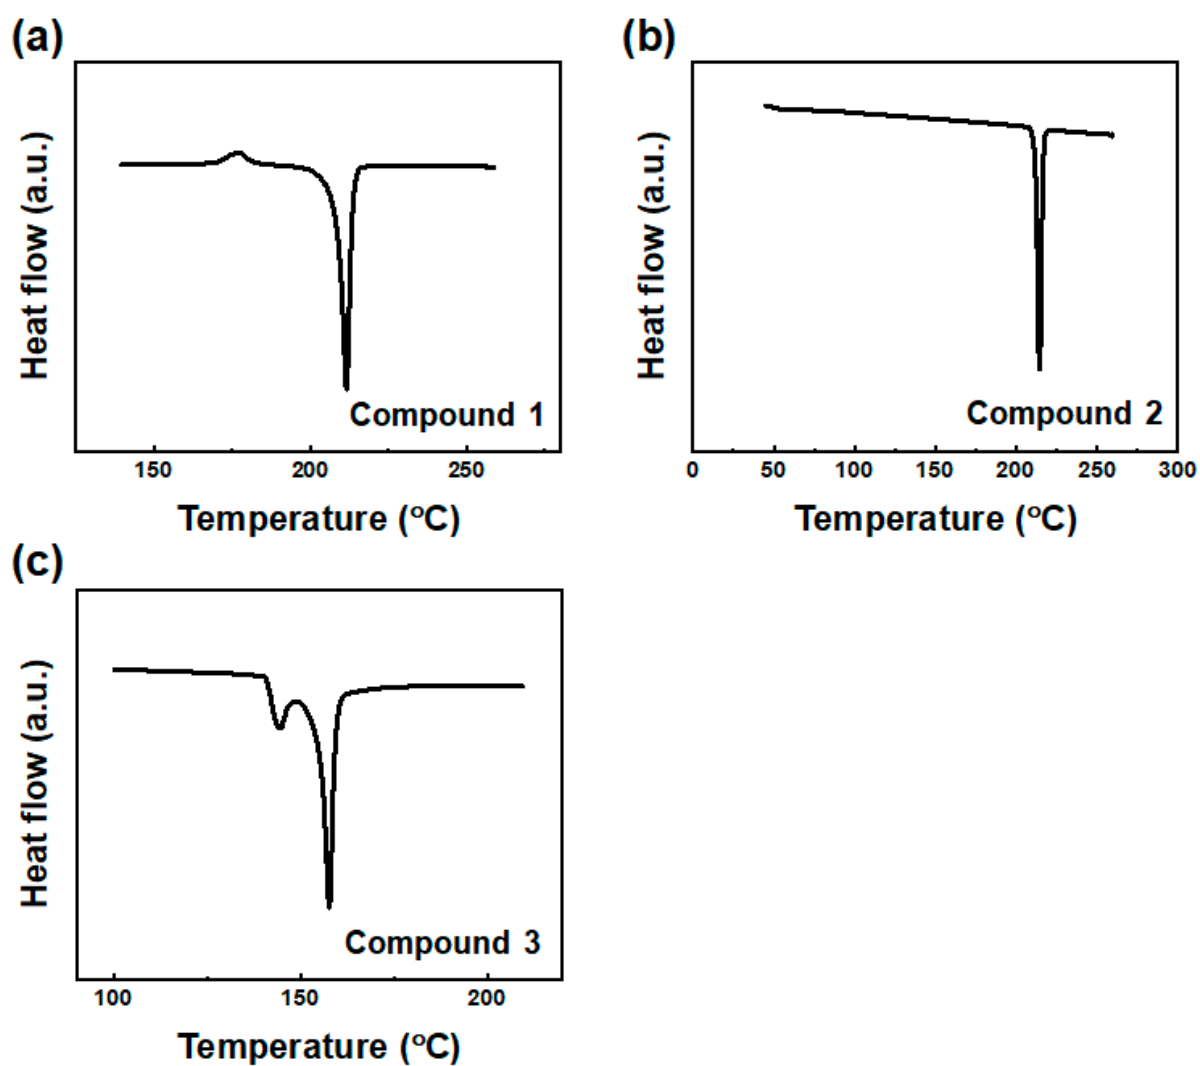

**Figure S2.** Differential scanning calorimetry (DSC) analysis of BTBT-derivatives, (a) compound 1, (b) compound 2, and (c) compound 3.

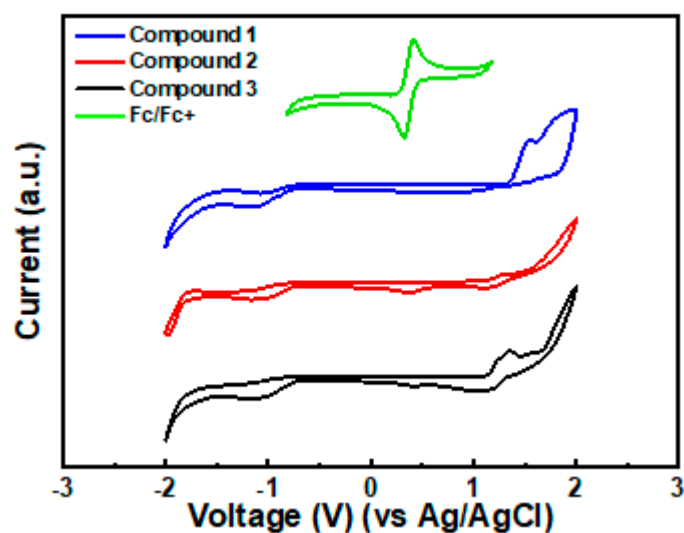

Figure S3. Cyclic voltammograms of compounds 1 – 3.

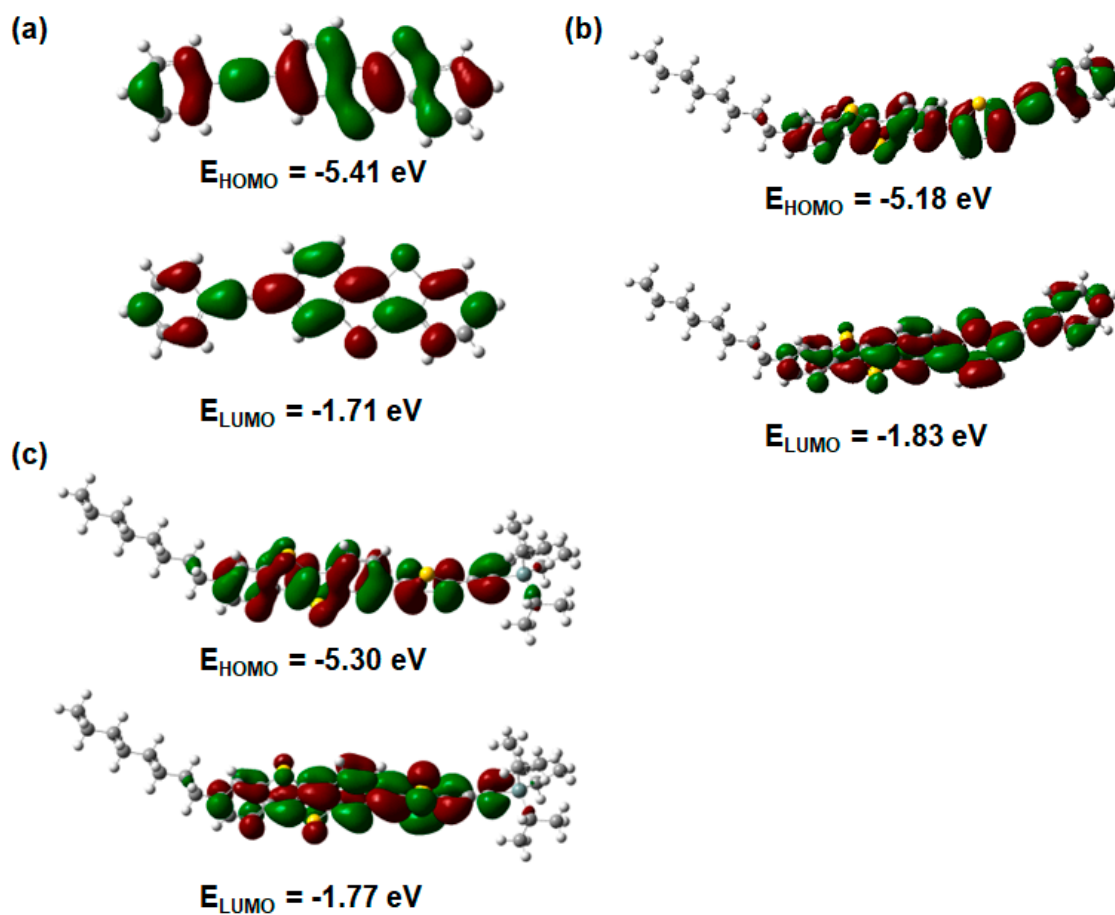

Figure S4. Molecular orbital surfaces of HOMO and LUMO by DFT calculation of compounds (a) 1, (b) 2, and (c) 3.

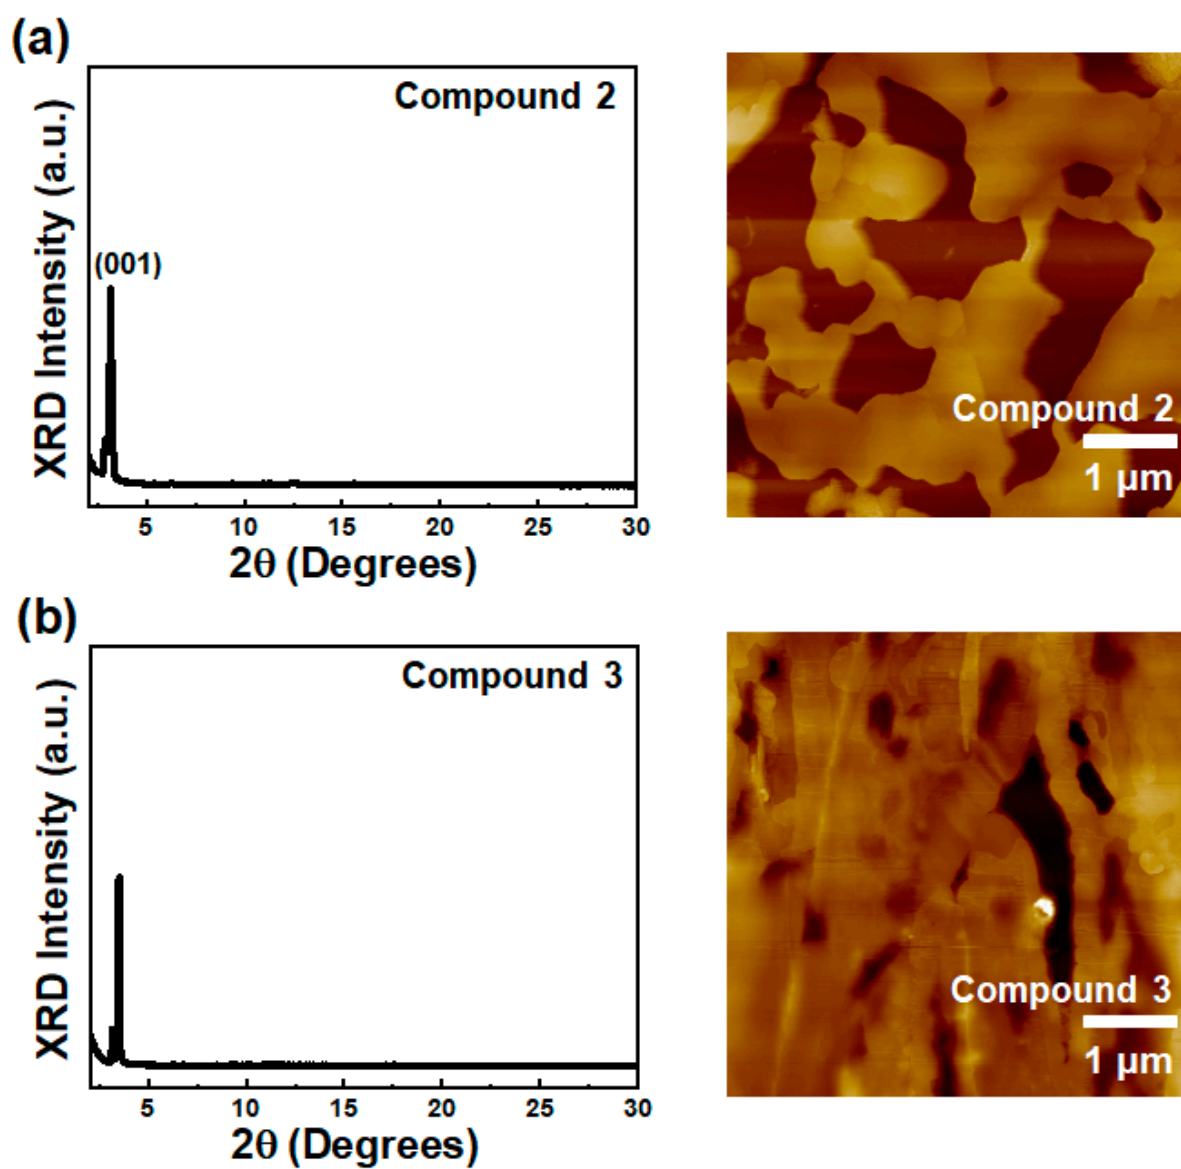

Figure S5. XRD profiles and AFM topographic images of solution-sheared film for (a) compound 2 and (b) compound 3.

28

29

30

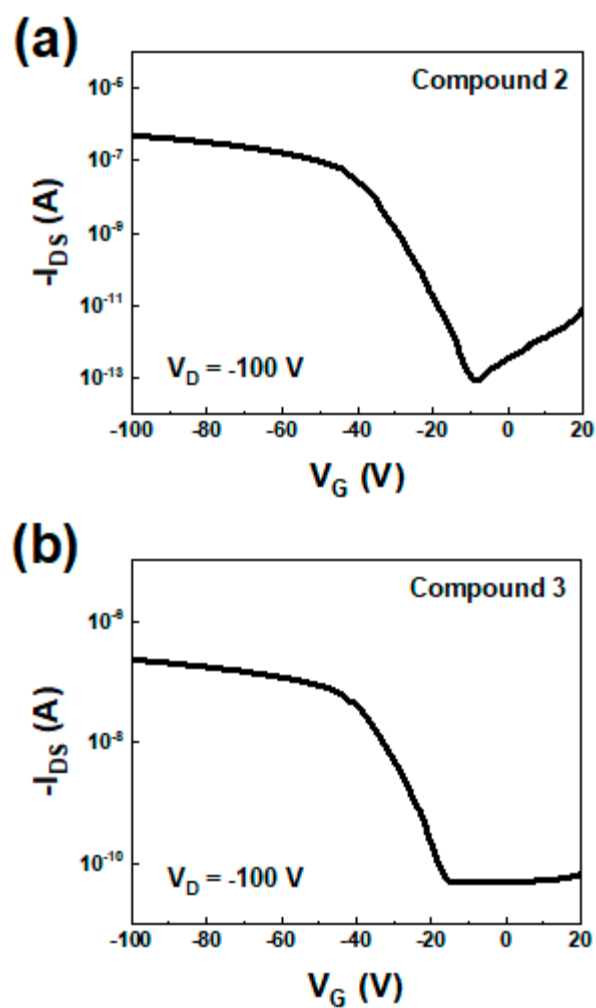

**Figure S6.** Representative transfer characteristics of OFETs based on (a) compound 2 and (b) compound 3.

31

32

33

34

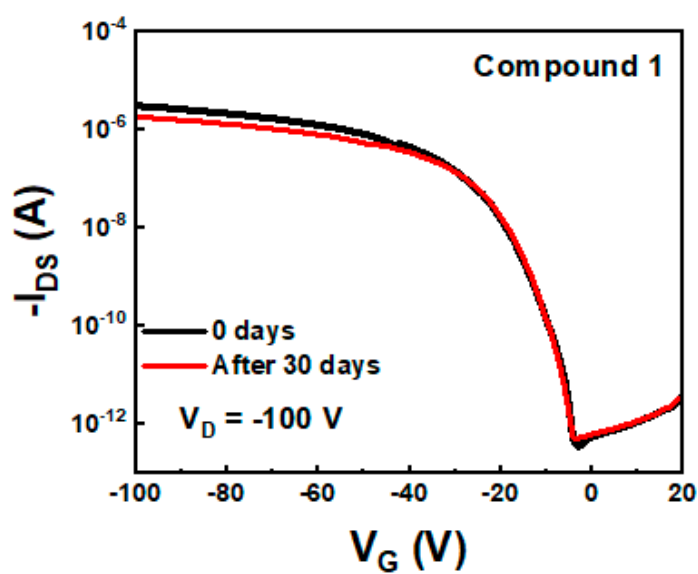

Figure S7. Transfer curve of OFETs based on compound 1 after 30 days of device fabrication.

35

36
