# Supplementary material for: Characterization of [1]Benzothieno[3,2-b]benzothiophene (BTBT) Derivatives with End-Capping Groups as Solution-Processable Organic Semiconductors for Organic Field-Effect Transistors
Source: MDPI journal article supplement (doi:10.3390/coatings13010181), 2023-01-13
Supplement: s1 [file s1]

Archive with 1 entries (1 files):
- coatings-2140015-supplementary.pdf
